# Supplementary material for: Iridoid Glycosides Isolated from Bellardia trixago Identified as Inhibitors of Orobanche cumana Radicle Growth
Source: MDPI journal article supplement (doi:10.3390/toxins14080559), 2022-08-17
Supplement: s1 [file s1]

# Supplementary Materials: Iridoid Glycosides Isolated from *Bellardia trixago* Identified as Inhibitors of *Orobanche cumana* radicle growth

Gabriele Soriano, Antonietta Siciliano, Mónica Fernández-Aparicio, Antonio Cala Peralta, Marco Masi, Antonio Moreno-Robles, Marco Guida, and Alessio Cimmino

## Supporting Information List

|                                                                                                             | Page |
|-------------------------------------------------------------------------------------------------------------|------|
| <b>Table S1.</b> Extract weights of organic extracts obtained from different <i>Bartsia trixago</i> organs. | 2    |
| <b>Scheme S1.</b> Purification scheme of EtOAc extract of <i>B. trixago</i> white green organs.             | 2    |
| <b>Figure S1.</b> <sup>1</sup> H NMR spectrum of benzoic acid, <b>1</b> (CDCl <sub>3</sub> , 400 MHz).      | 3    |
| <b>Figure S2.</b> <sup>1</sup> H NMR spectrum of bartsioside, <b>2</b> (MeOD, 500 MHz).                     | 3    |
| <b>Figure S3.</b> <sup>1</sup> H NMR spectrum of aucubin, <b>3</b> (MeOD, 400 MHz).                         | 4    |
| <b>Figure S4.</b> <sup>1</sup> H NMR spectrum of melampyroside, <b>4</b> (MeOD, 400 MHz).                   | 4    |
| <b>Figure S5.</b> <sup>13</sup> C NMR spectrum of melampyroside, <b>4</b> (MeOD, 100 MHz).                  | 5    |
| <b>Figure S6.</b> NOESY spectrum of melampyroside, <b>4</b> (MeOD, 400 MHz).                                | 5    |
| <b>Figure S7.</b> <sup>1</sup> H NMR spectrum of gardoside methyl ester, <b>5</b> (MeOD, 400 MHz).          | 6    |
| <b>Figure S8.</b> <sup>1</sup> H NMR spectrum of mussaenoside, <b>6</b> (MeOD, 500 MHz).                    | 6    |

**Table S1.** Extract weights of organic extracts obtained from different *Bartsia trixago* organs.

| <i>Bartsia trixago</i> organ | <i>n</i> -Hexane extract weight | CH <sub>2</sub> Cl <sub>2</sub> extract weight | EtOAc extract weight |
|------------------------------|---------------------------------|------------------------------------------------|----------------------|
| White flowers                | 2.79 mg                         | 12.11 mg                                       | 27.28 mg             |
| White roots                  | 1.24 mg                         | 3.39 mg                                        | 13.39 mg             |
| White green organs           | 1.00 mg                         | 10.52 mg                                       | 44.67 mg             |
| Yellow flowers               | 1.22 mg                         | 10.13 mg                                       | 21.00 mg             |
| Yellow roots                 | 1.42 mg                         | 3.78 mg                                        | 13.85 mg             |
| Yellow green organs          | 2.74 mg                         | 19.35 mg                                       | 11.54 mg             |

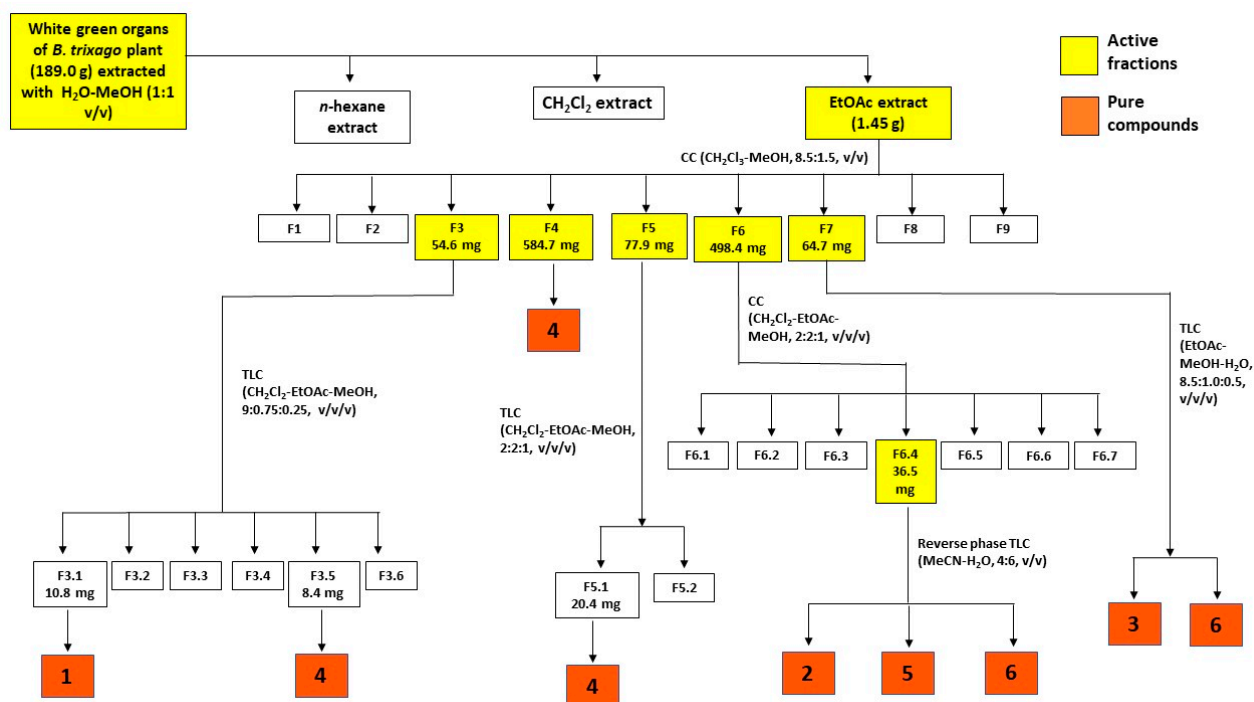

**Scheme S1.** Purification scheme of EtOAc extract of *B. trixago* white green organs.

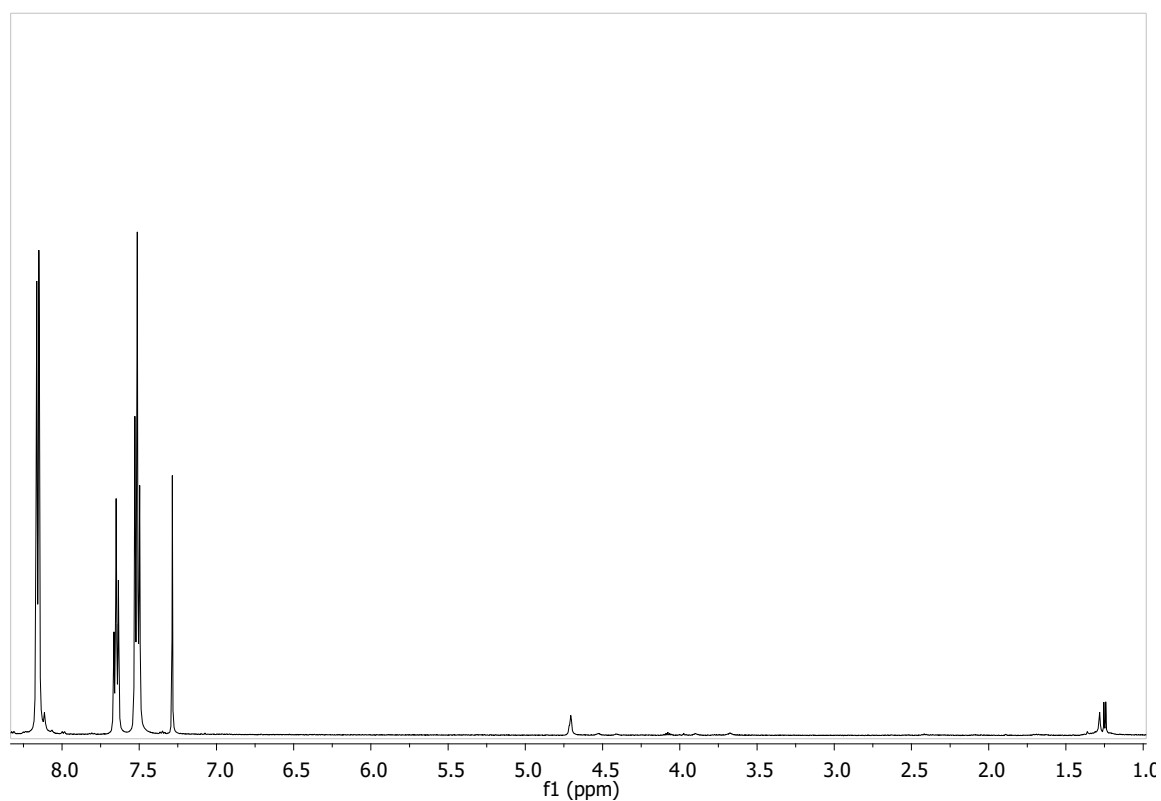

**Figure S1.**  $^1\text{H}$  NMR spectrum of benzoic acid, **1** ( $\text{CDCl}_3$ , 400 MHz).

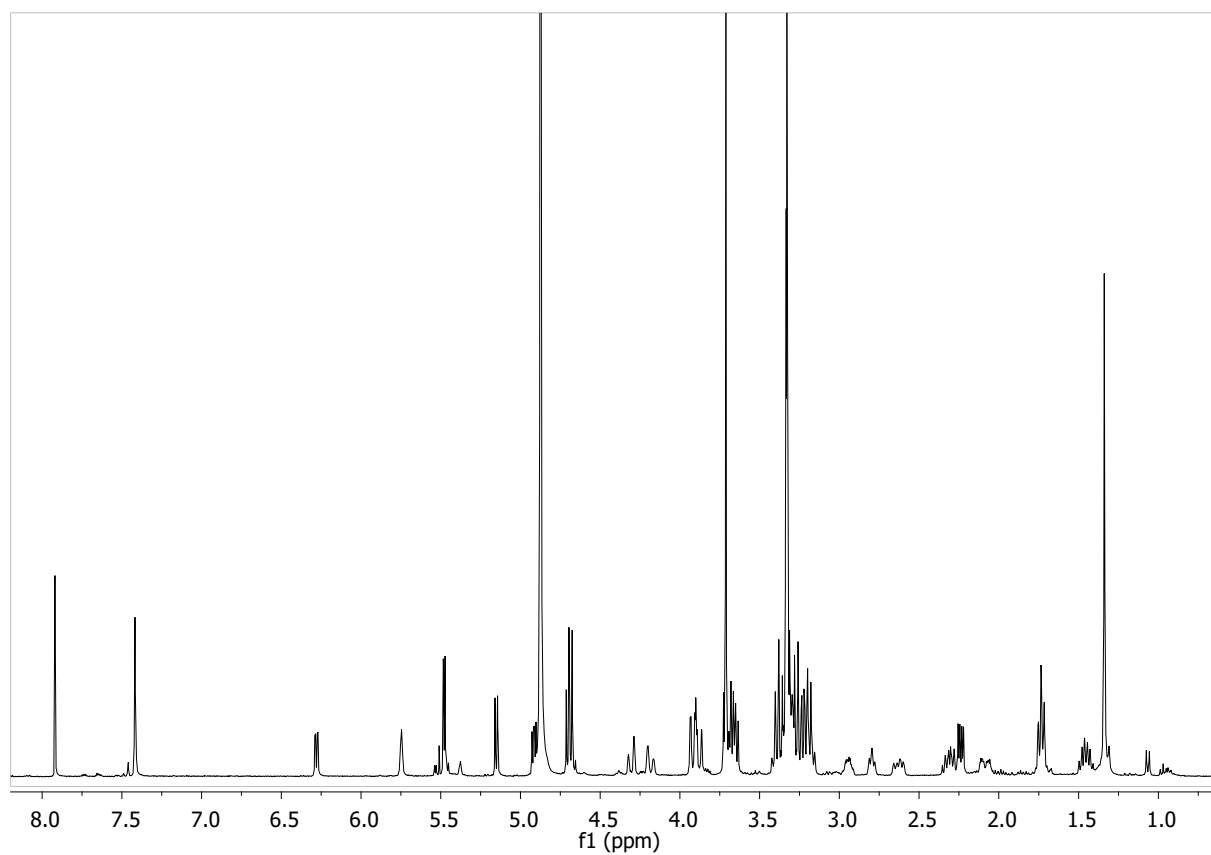

**Figure S2.**  $^1\text{H}$  NMR spectrum of bartsioside, **2** ( $\text{MeOD}$ , 500 MHz).

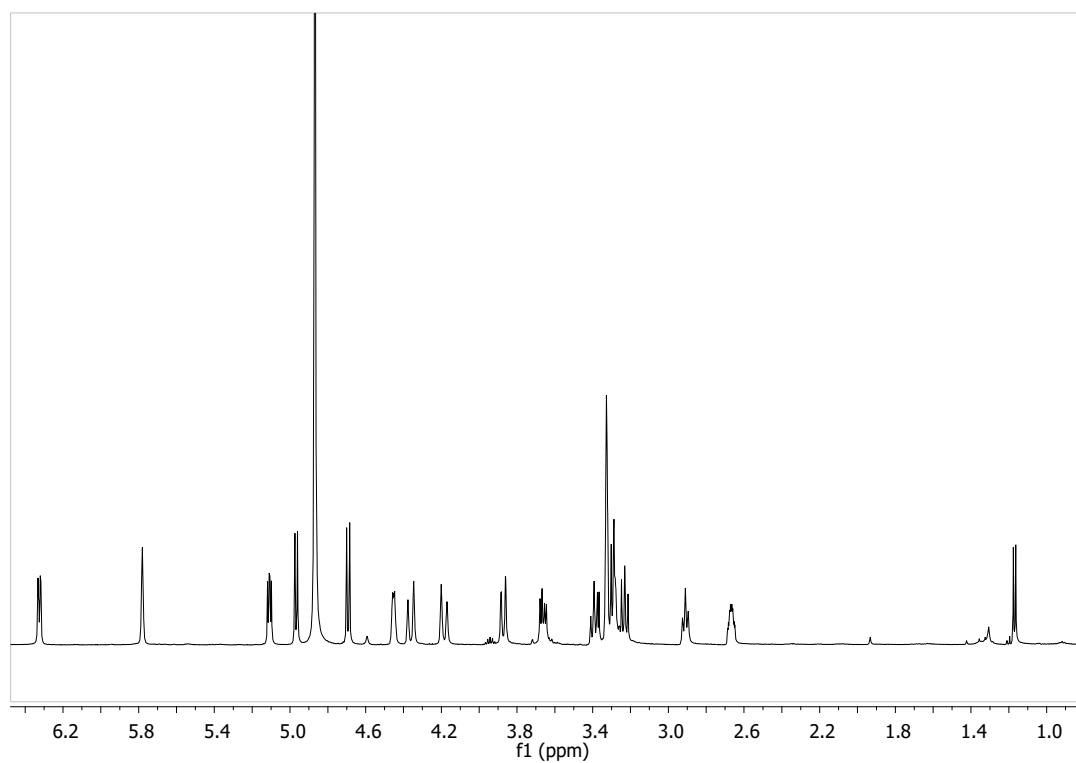

**Figure S3.**  $^1\text{H}$  NMR spectrum of aucubin, 3 ( $\text{MeOD}$ , 400 MHz).

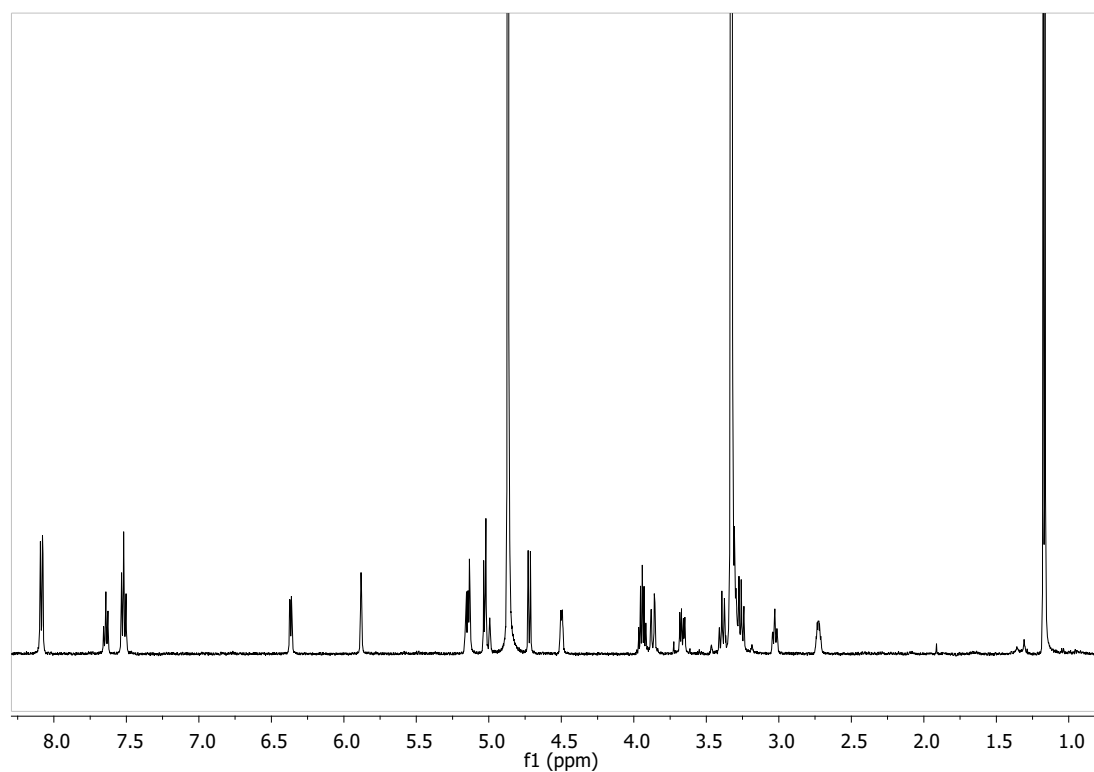

**Figure S4.** <sup>1</sup>H NMR spectrum of melampyroside, 4 (MeOD, 400 MHz).

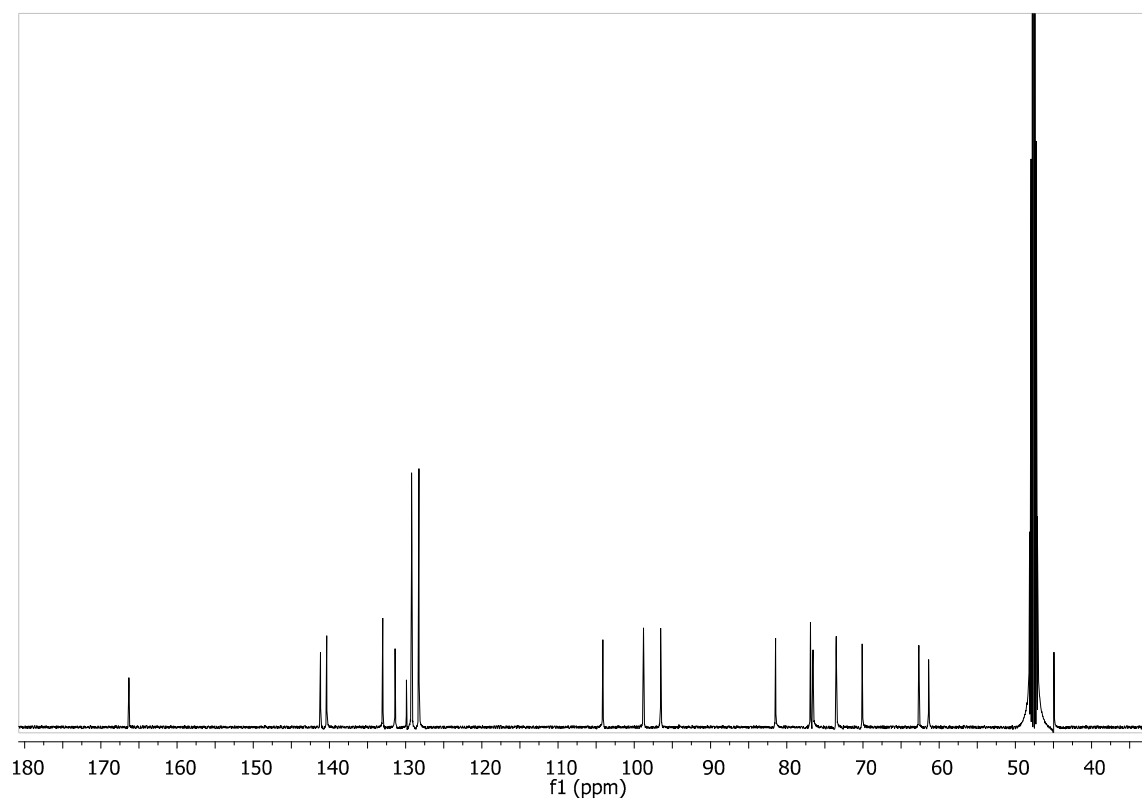

**Figure S5.**  $^{13}\text{C}$  NMR spectrum of melampyroside, 4 ( $\text{MeOD}$ , 100 MHz).

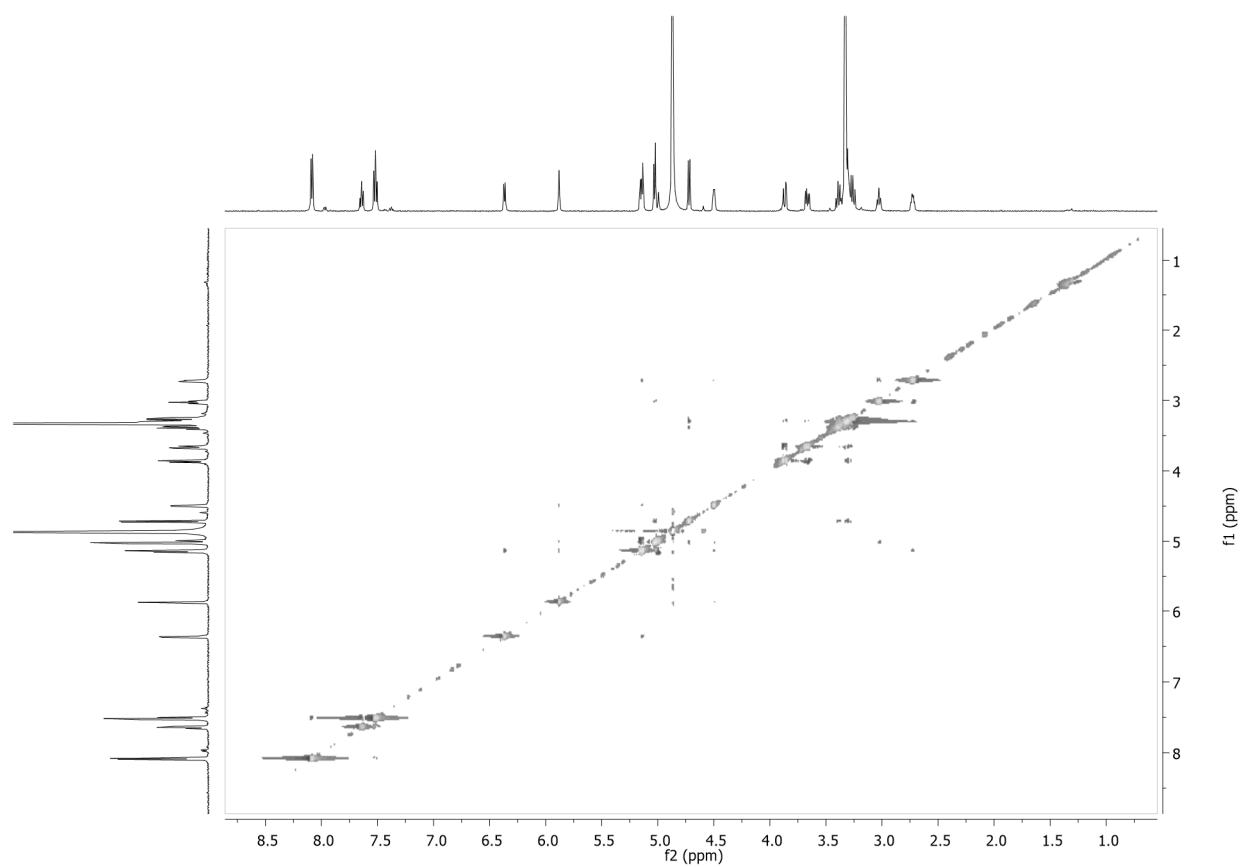

**Figure S6.** NOESY spectrum of melampyroside, **4** (MeOD, 400 MHz).

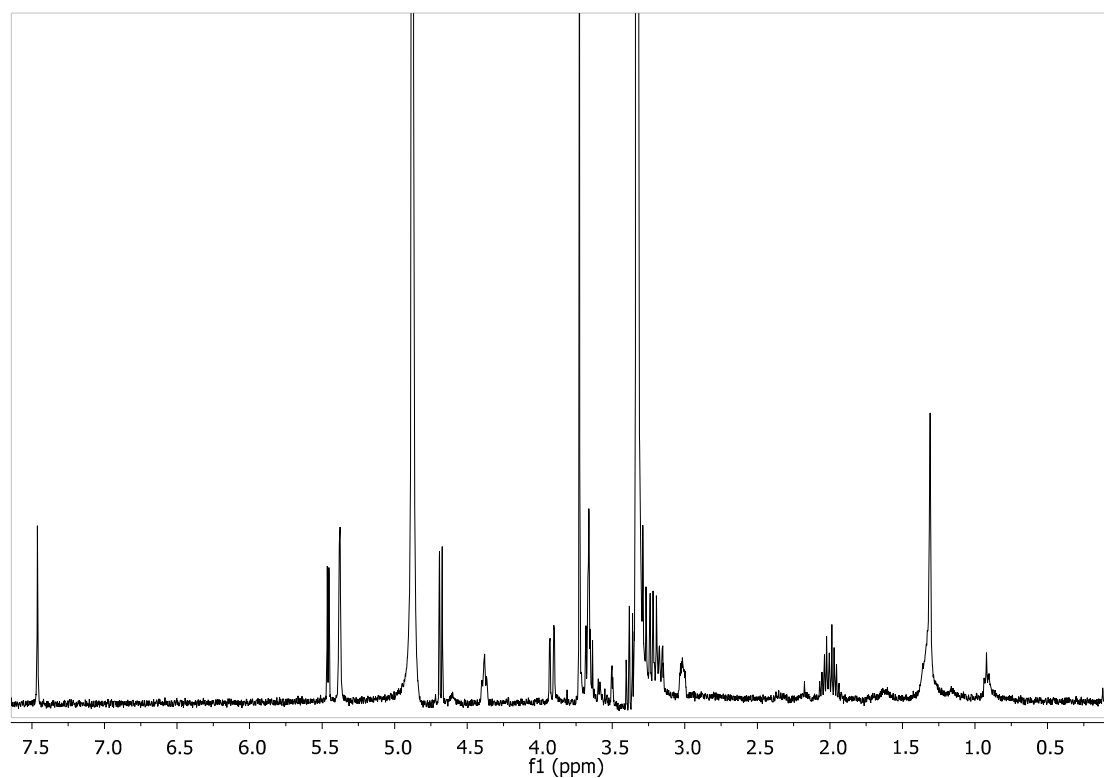

**Figure S7.**  $^1\text{H}$  NMR spectrum of gardoside methyl ester, 5 ( $\text{MeOD}$ , 400 MHz).



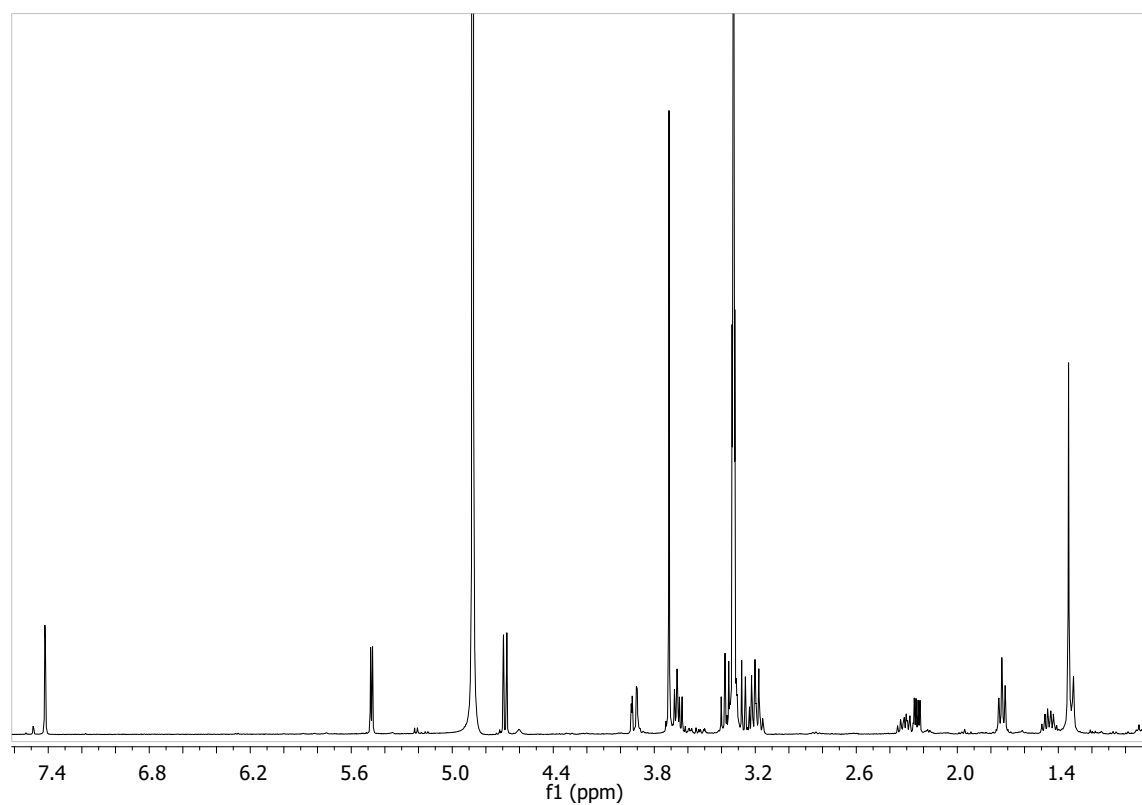

**Figure S8.**  $^1\text{H}$  NMR spectrum of mussaenoside, 6 ( $\text{MeOD}$ , 500 MHz).
